# Supplementary material for: Synthesis of Novel Fluorinated Xanthine Derivatives with High Adenosine A2B Receptor Binding Affinity
Source: MDPI journal article supplement (doi:10.3390/ph14050485), 2021-05-19
Supplement: s1 [file s1]

## Synthesis of novel fluorinated xanthine derivatives with high adenosine A<sub>2B</sub> receptor binding affinity

Marcel Lindemann<sup>1\*</sup>, Sladjana Dukic-Stefanovic<sup>1,2</sup>, Sonja Hinz<sup>3</sup>, Winnie Deuther-Conrad<sup>1</sup>, Rodrigo Teodoro<sup>1</sup>, Cathleen Juhl<sup>2</sup>, Jörg Steinbach<sup>1</sup>, Peter Brust<sup>1</sup>, Christa E. Müller<sup>3</sup>, Barbara Wenzel<sup>1</sup>

<sup>1</sup> Helmholtz-Zentrum Dresden-Rossendorf, Institute of Radiopharmaceutical Cancer Research, Department of Neuroradiopharmaceuticals, Leipzig, Germany; marcel.lindemann.cor@gmail.com (M.L.), s.dukic-stefanovic@hzdr.de (S.D.-S.), w.deuther-conrad@hzdr.de (W.D.-C.), r.teodoro@hzdr.de (R.T.), Steinbach-joerg@web.de (J.S.), p.brust@hzdr.de (P.B.), b.wenzel@hzdr.de (B.W.)

<sup>2</sup> ROTOP Pharmaka GmbH, Dresden, Germany; service@rotop-pharmaka.de (S.D.S. and C.J.)

<sup>3</sup> Pharma Center Bonn, Pharmaceutical Institute, Pharmaceutical & Medicinal Chemistry, University of Bonn, Bonn, Germany; Sonja.Hinz@uni-wh.de (S.H.), christa.mueller@uni-bonn.de (C.E.M.)

\* Correspondence: marcel.lindemann.cor@gmail.com

### Content:

|                                                                                                                           |       |
|---------------------------------------------------------------------------------------------------------------------------|-------|
| 1. Synthesis of the precursor compound <b>4</b> .....                                                                     | 2     |
| 2. <sup>1</sup> H, <sup>13</sup> C, <sup>19</sup> F NMR spectra and mass spectra of compounds <b>5</b> and <b>6</b> ..... | 3 - 6 |
| 3. References.....                                                                                                        | 7     |

## 1. Synthesis of the precursor compound 4

Starting with 6-aminouracil **9** in a selective *N*-alkylation [1,2], nitrosylation and reduction with hydrogen and palladium on carbon to the diamine **11** was performed [2,3]. The 4-((4-nitrophenoxy)sulfonyl)benzoic acid was synthesized over a two-step approach starting from potassium 4-sulfobenzoate, which was chlorinated and converted to the final sulfonyl ester [4]. Instead of using 1-ethyl-3-(3-dimethylaminopropyl)carbodiimide (EDC) [4], benzotriazolooxytris(dimethylamino)phosphoniumhexafluorophosphat (BOP) was used for the formation of the amide **12**, because it already showed good results in another study [5]. The reaction was performed in dichloromethane (DCM) with triethylamine (TEA) as base, to result in **12** with moderate yields of around 36%. The obtained amide **12** was intramolecular cyclized to result in the xanthine backbone precursor **4** with a yield of 91% [4].

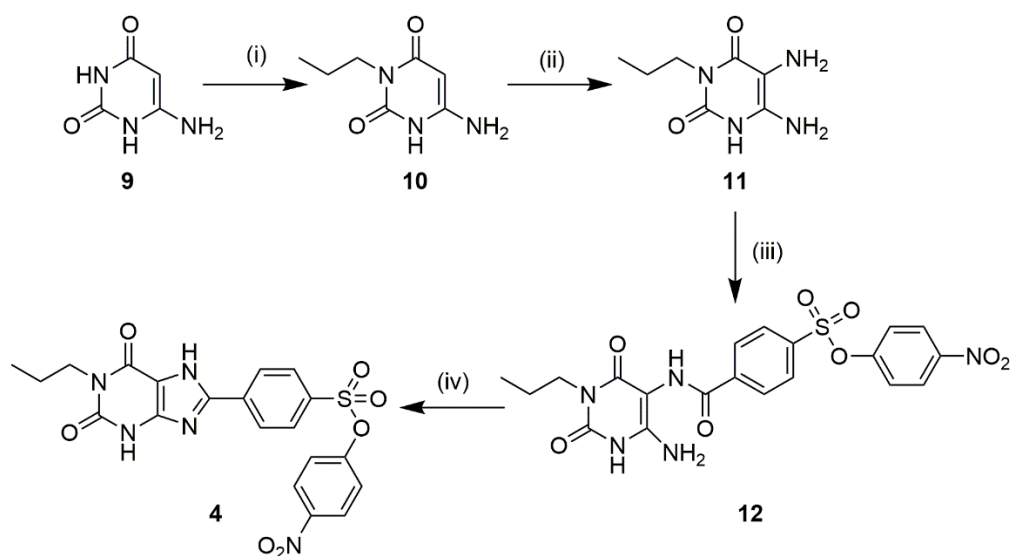

**Scheme S1.** Synthesis of xanthine backbone **4**. Reaction conditions: (i) a) cat.  $(\text{NH}_4)_2\text{SO}_4$ , 1,1,1,3,3,3-hexamethyldisilazan, reflux, 2 h, b) toluene, 1-iodopropane, reflux, 16 h, c) sat. aq.  $\text{NaHCO}_3$ , 71%; (ii) a) 50% aq.  $\text{HOAc}$ ,  $\text{NaNO}_2$ , 70 °C, 30 min, b)  $\text{H}_2/\text{Pd/C}$ , ethanol, room temperature, 5 h, 85%; (iii) BOP, TEA, 4-((4-nitrophenoxy)sulfonyl)benzoic acid, DCM, room temperature, 2 d, 36%; (iv) polyphosphoric acid trimethylsilyl ester, 145 °C, 8 h, 91%.

## 2. $^1\text{H}$ , $^{13}\text{C}$ , $^{19}\text{F}$ NMR and mass spectra of compounds 5 and 6

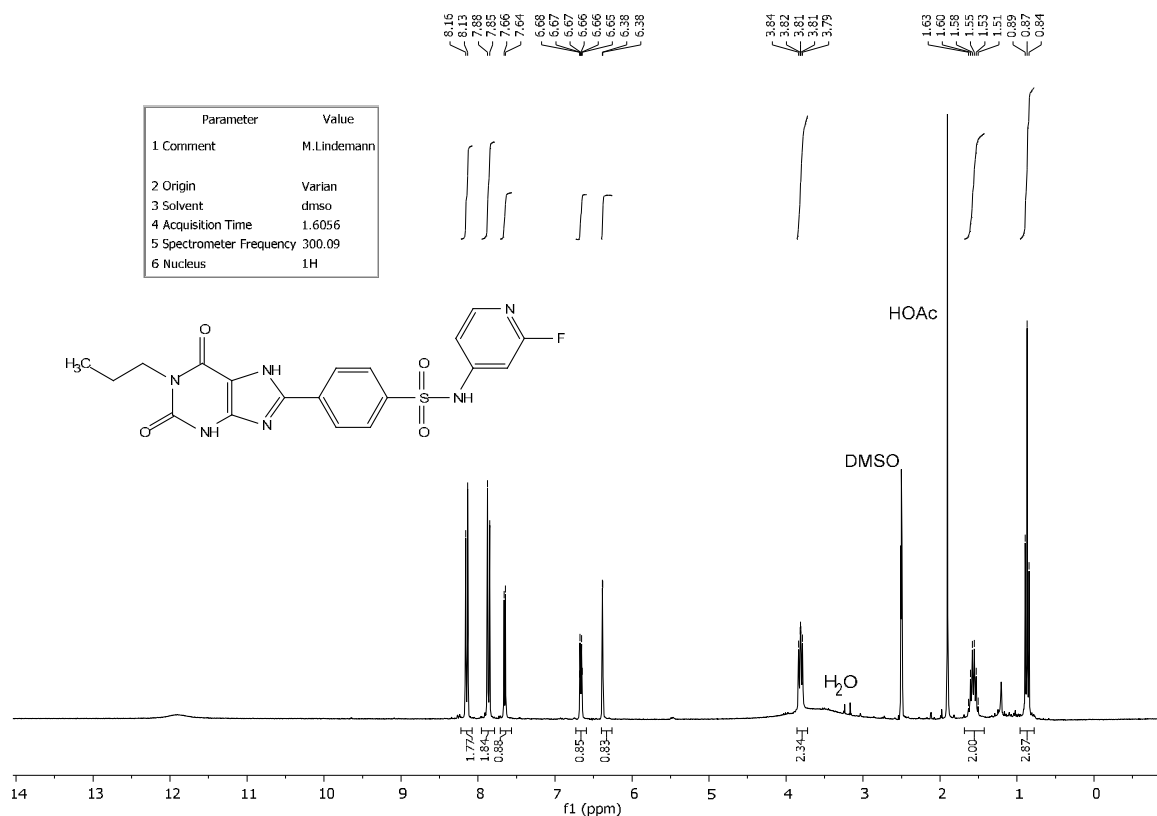

Figure S1.  $^1\text{H}$  NMR spectrum of compound 5.

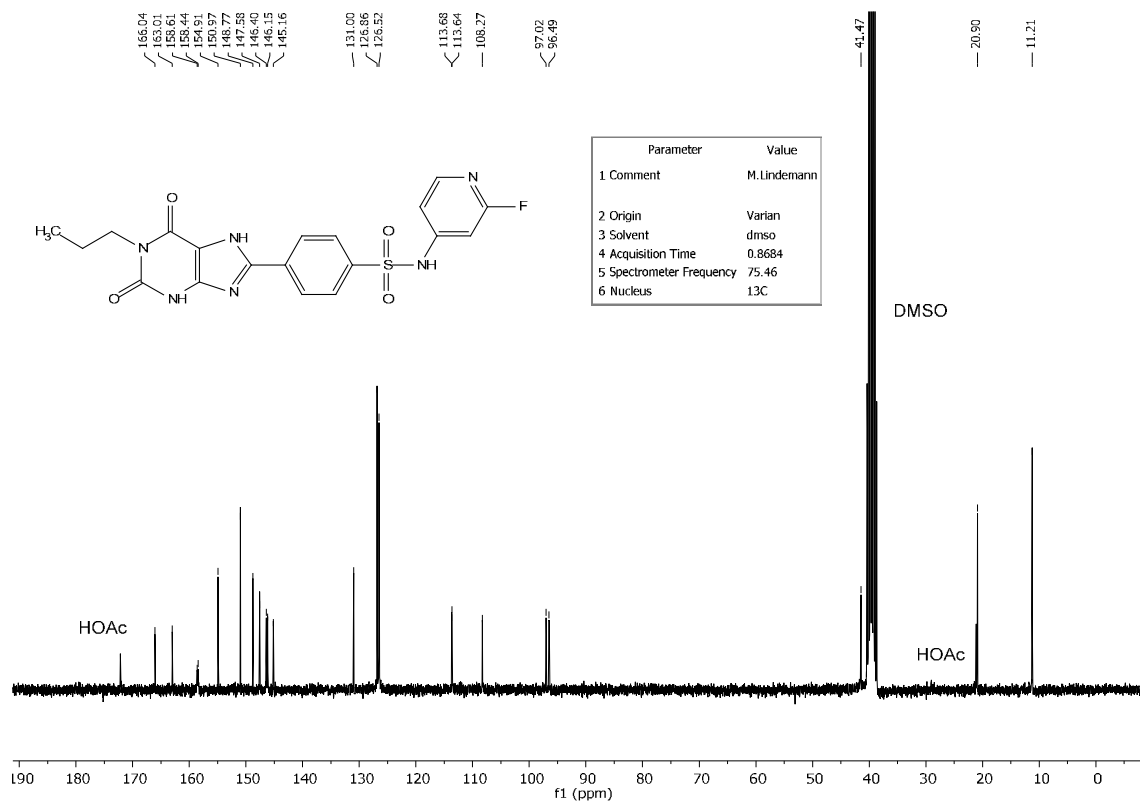

Figure S2.  $^{13}\text{C}$  NMR spectrum of compound 5.

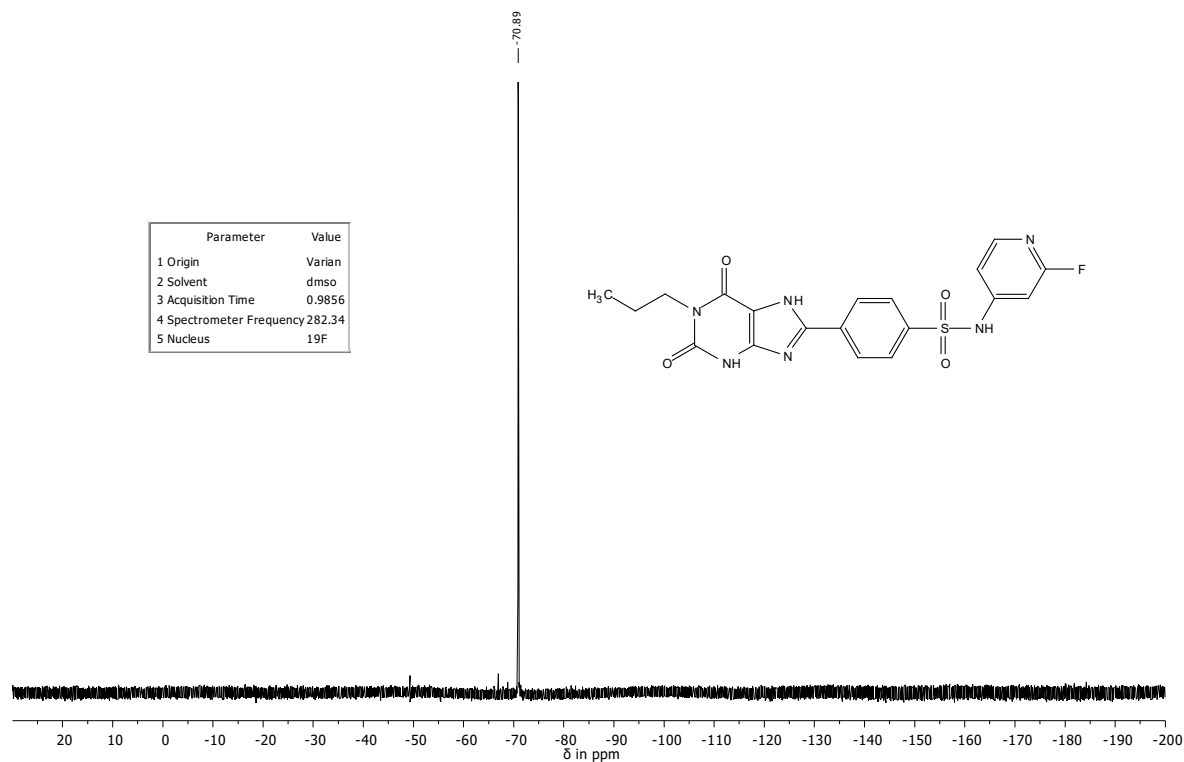

Figure S3. <sup>19</sup>F NMR spectrum of compound 5.

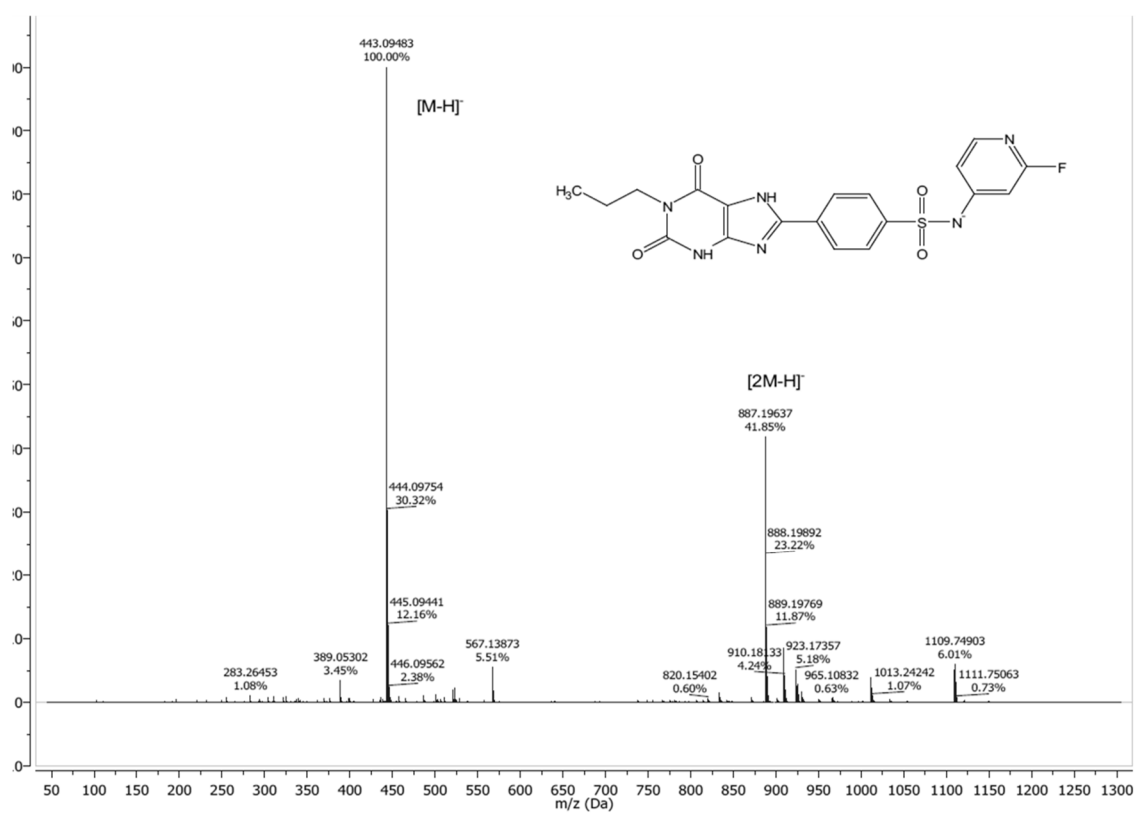

Figure S4. Mass spectrum of compound 5.

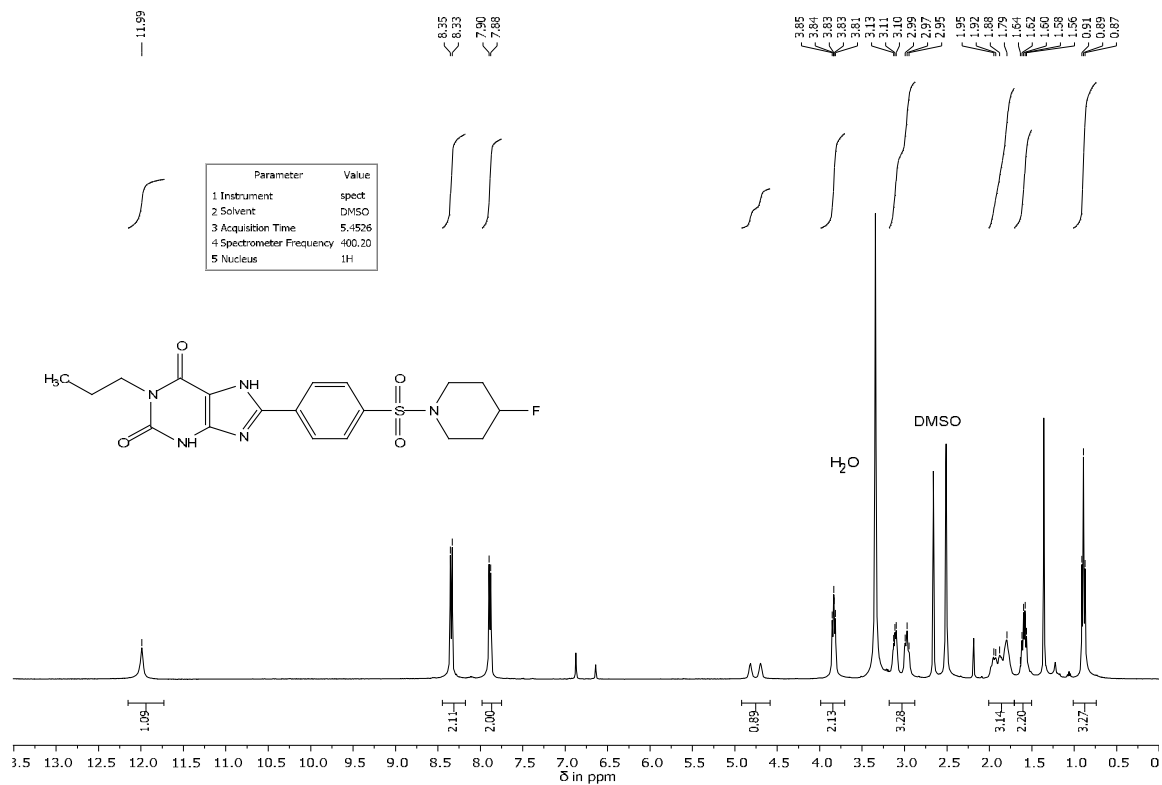

Figure S5. <sup>1</sup>H NMR spectrum of compound 6.

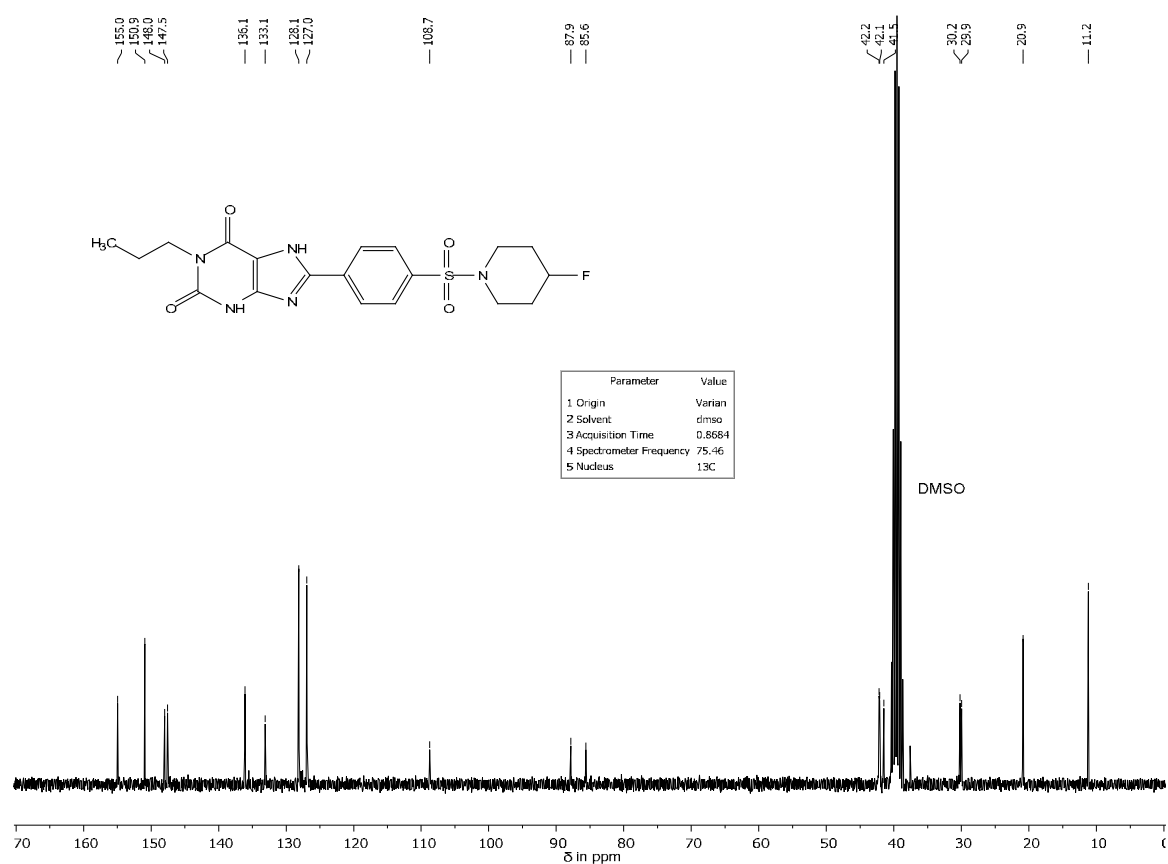

Figure S6. <sup>13</sup>C NMR spectrum of compound 6.

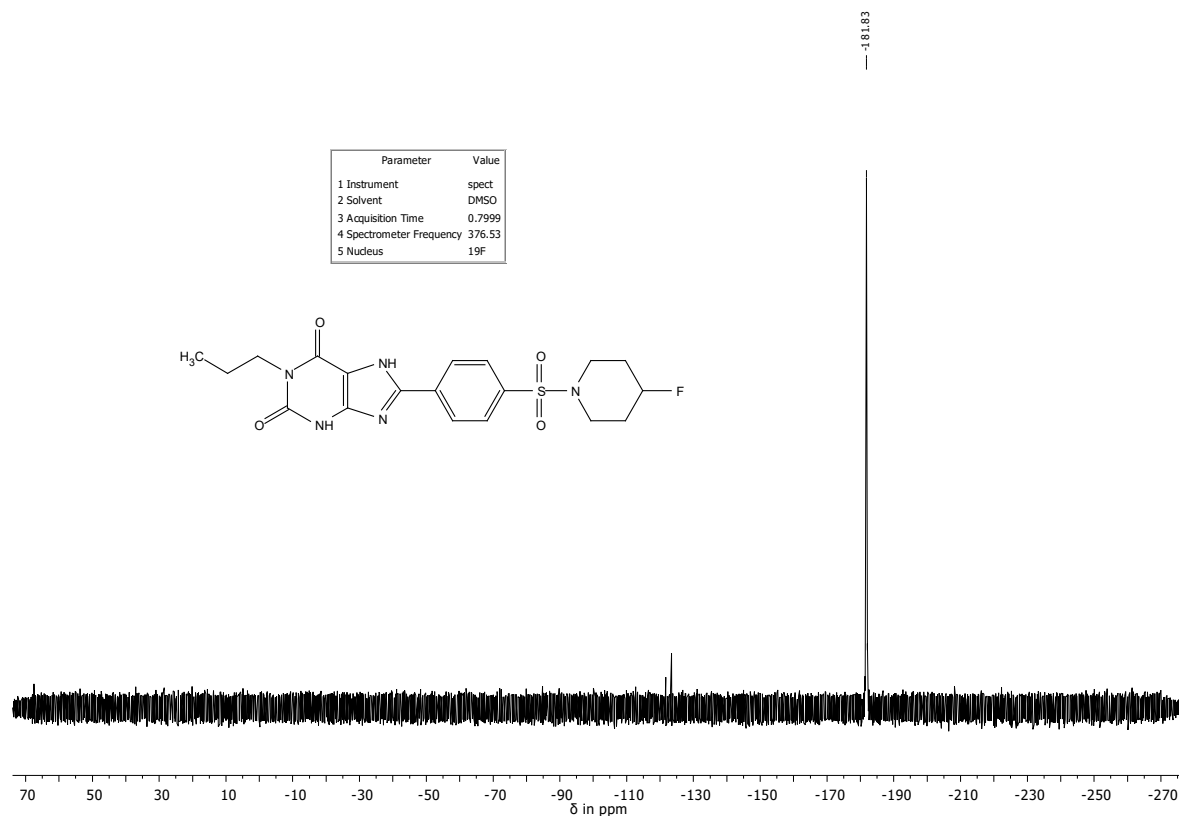

**Figure S7.** <sup>19</sup>F NMR spectrum of compound 6.

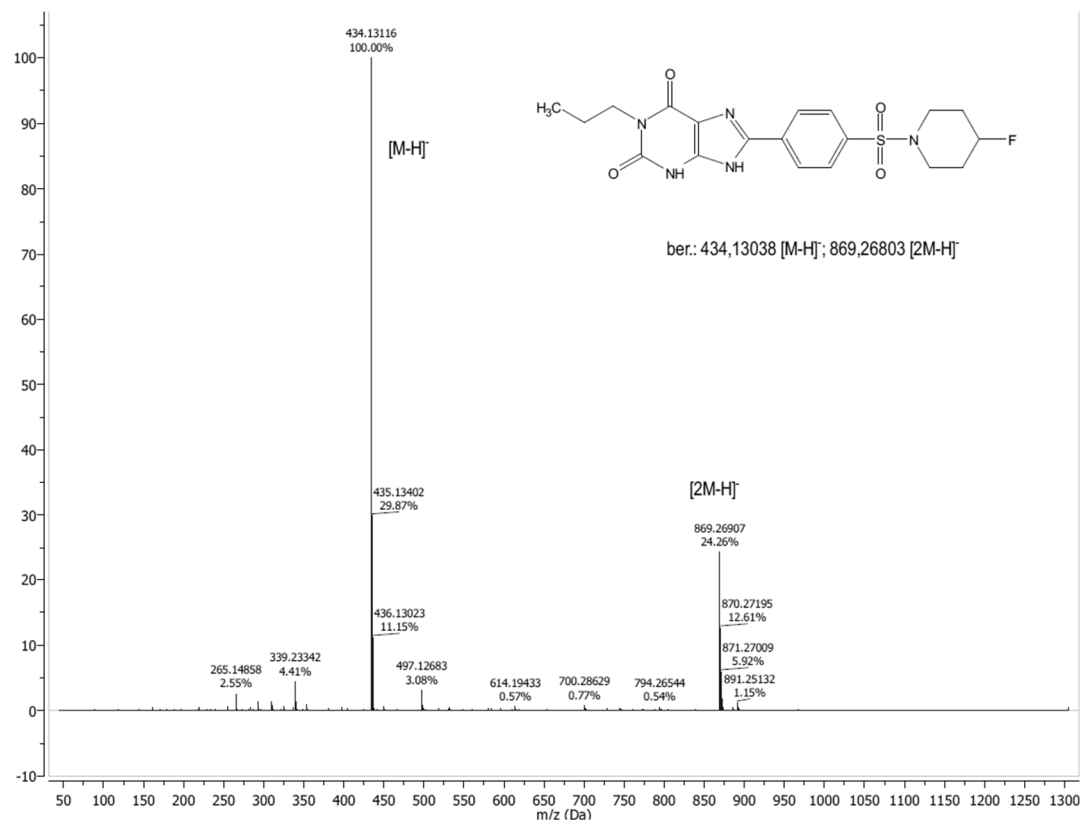

**Figure S8.** Mass spectrum of compound 6.

### 3. References

1. Müller, C.E. Synthesis of 3-substituted 6-aminouracils. *Tetrahedron Lett.* **1991**, 32, 6539-6540, doi:[http://dx.doi.org/10.1016/0040-4039\(91\)80214-Q](http://dx.doi.org/10.1016/0040-4039(91)80214-Q).
2. Müller, C.E.; Sandoval-Ramírez, J. A new versatile synthesis of xanthines with variable substituents in the 1-, 3-, 7- and 8-positions. *Synthesis* **1995**, 1995, 1295-1299, doi:10.1055/s-1995-4082.
3. Müller, C.E. General synthesis and properties of 1-monosubstituted xanthines. *Synthesis* **1993**, 1993, 125-128, doi:10.1055/s-1993-25814.
4. Yan, L.; Müller, C.E. Preparation, properties, reactions and adenosine receptor affinities of sulfophenylxanthine nitrophenyl esters: toward the development of sulfonic acid prodrugs with peroral bioavailability. *J. Med. Chem.* **2004**, 47, 1031-1043, doi:10.1021/jm0310030.
5. Lindemann, M.; Deuther-Conrad, W.; Moldovan, R.; Sekhar, K.V.G.C.; Brust, P.; Wenzel, B. Do spiroindolines have the potential to replace vesamicol as lead compound for the development of radioligands targeting the vesicular acetylcholine transporter? *Bioorg. Med. Chem.* **2017**, 25, 5107-5113, doi:<https://doi.org/10.1016/j.bmc.2017.03.028>.
